# Supplementary material for: Assessment of urinary oxidative stress biomarkers associated with fine particulate matter (PM2.5) exposure in Chiang Mai, Thailand
Source: PeerJ. 2025 Feb 26;13:e19047. doi: 10.7717/peerj.19047 (PMC11871891; doi:10.7717/peerj.19047)
Supplement: Supplemental Information 1 [file peerj-13-19047-s001.xlsx]

## Sheet: Biomarkers data
Results of BIOMARKERS in urine
ID	Visit 2 (Low season of PM2.5)										Visit 1 (High season of PM2.5)
	Creatinine (mg/ml)	Creatinine (g/ml)	1-OHP (mg/g creatinine)	1-OHP (ng/g creatinine)	Urine MDA (µM)	MDA (µM/mg creatinine)	MDA (µM/g creatinine)	8-epi-PGF2α (pg/ml)	8-epi-PGF2α (pg/mg creatinine)	8-epi-PGF2α (pg/g creatinine)	Creatinine (mg/ml)	Creatinine (g/ml)	1-OHP (mg/g creatinine)	1-OHP (ng/g creatinine)	Urine MDA (µM)	MDA (µM/mg creatinine)	MDA (µM/g creatinine)	8-epi-PGF2α (pg/ml)	8-epi-PGF2α (pg/mg creatinine)	8-epi-PGF2α (pg/g creatinine)
2	1.60069	0.00160069	0.0639099	639.09	4.38462	2.7392	2739.2	456.671	285.296	285296	1.25121	0.00125121	0.0617801	61780.1	3.54327	2.83187	2831.87	279.955	223.747	223747
4	1.47612	0.00147612	0.0382759	38.2759	3.59135	2.43296	2432.96	129.85	87.9666	87966.6	1.80484	0.00180484	0.0431616	43161.6	3.92788	2.1763	2176.3	ND	ND	ND
5	1.78754	0.00178754	0.0395515	39.5515	3.59135	2.0091	2009.1	91.312	51.0824	51082.4	1.15087	0.00115087	0.051092	51092	4.16827	3.62186	3621.86	118.169	102.678	89218.2
6	2.28235	0.00228235	0.112515	112.515	4.55288	1.99482	1994.82	24.7741	10.8546	10854.6	1.79446	0.00179446	0.419958	419958	4.3125	2.40323	2403.23	ND	ND	ND
11	2.15087	0.00215087	0.0443542	44.3542	4.50481	2.09442	2094.42	306.523	142.511	142511	2.1128	0.0021128	0.0538148	53814.8	4.14423	1.96148	1961.48	ND	ND	ND
12	2.63875	0.00263875	0.0261108	26.1108	4.50481	1.70717	1707.17	133.805	50.7075	50707.5	1.791	0.001791	0.0443327	44332.7	5.00962	2.7971	2797.1	ND	ND	ND
13	1.70104	0.00170104	0.15855	158.55	4.24038	2.49282	2492.82	9.76961	5.74332	5743.32	1.54533	0.00154533	0.129552	129552	4.86538	3.14845	3148.45	ND	ND	ND
14	2.94325	0.00294325	0.0520852	52.0852	3.49519	1.18753	1187.53	0.690085	0.234464	234.464	1.32734	0.00132734	0.0744348	74434.8	3.92788	2.95922	2959.22	ND	ND	ND
16	1.22699	0.00122699	0.135046	135.046	3.59135	2.92696	2926.96	47.0966	38.3839	38383.9	1.14048	0.00114048	0.173873	173873	3.6875	3.23328	3233.28	131.537	115.334	101127
19	0.787543	0.000787543	0.105899	105.899	3.47115	4.40757	4407.57	114.276	145.105	145105	0.621453	0.000621453	0.0909159	90915.9	4.45673	7.17147	7171.47	81.1129	130.521	210026
21	1.4	0.0014	1.06721	1067.21	3.30288	2.3592	2359.2	111.483	79.6306	79630.6	1.62145	0.00162145	2.72842	2.72842e+06	4	2.46692	2466.92	46.2928	28.5502	17607.8
24	1.25467	0.00125467	0.359297	359.297	3.83173	3.05397	3053.97	16.446	13.1079	13107.9	1.89827	0.00189827	0.210982	210982	4.19231	2.20849	2208.49	42.8389	22.5674	11888.4
25	1.77024	0.00177024	0.0501061	50.1061	3.0625	1.72999	1729.99	217.316	122.761	122761	1.0436	0.0010436	0.0642968	64296.8	4.28846	4.1093	4109.3	159.576	152.909	146521
33	0.842907	0.000842907	0.0213547	21.3547	3.18269	3.77585	3775.85	170.545	202.33	202330	0.912111	0.000912111	0.145377	145377	3.13462	3.43666	3436.66	109.753	120.328	131923
34	1.70796	0.00170796	0.00322022	3.22022	2.67788	1.56789	1567.89	7.69778	4.50701	4507.01	0.424221	0.000424221	ND	ND	3.85577	9.08905	9089.05	51.2916	120.908	285010
35	NA	NA	NA	NA	3.71154	NA	NA	33.0084	NA	ND	NA	NA	NA	NA	4.28846	ND	ND	25.2655	ND	ND
36	2.06782	0.00206782	0.0207948	20.7948	3.51923	1.7019	1701.9	111.309	53.8293	53829.3	1.24429	0.00124429	0.0652581	65258.1	3.83173	3.07945	3079.45	107.351	86.2745	69.3363
40	1.61453	0.00161453	0.0263234	26.3234	3.95192	2.44772	2447.72	194.769	120.635	120635	1.22353	0.00122353	0.043399	43399	3.47115	2.837	2837	33.8978	27.705	22.6435
41	1.35502	0.00135502	0.0216971	21.6971	2.65385	1.95853	1958.53	29.8574	22.0347	22034.7	0.981315	0.000981315	0.10221	102210	3.44712	3.51275	3512.75	306.523	312.359	318.307
42	1.22007	0.00122007	0.00942569	9.42569	4.02404	3.29821	3298.21	32.6282	26.7429	26742.9	0.188927	0.000188927	0.229718	229718	3.375	17.864	17864	116.215	615.13	3255.91
43	2.0436	0.0020436	0.0242709	24.2709	2.89423	1.41624	1416.24	71.1658	34.8238	34823.8	0.998616	0.000998616	0.0858188	85818.8	2.89423	2.89824	2898.24	ND	ND	ND
44	0.292734	0.000292734	0.00819857	8.19857	3.08654	10.5438	10543.8	123.212	420.901	420901	0.90173	0.00090173	0.05434	54340	2.77404	3.07635	3076.35	304.636	337.835	374.652
46	0.925952	0.000925952	0.0632862	63.2862	2.99038	3.22952	3229.52	50.2023	54.2169	54216.9	0.842907	0.000842907	0.105231	105231	2.91827	3.46215	3462.15	129.103	153.165	181.71
47	0.631834	0.000631834	0.0191506	19.1506	4.14423	6.55905	6559.05	192.838	305.204	305204	0.624913	0.000624913	0.135379	135379	3.47115	5.55461	5554.61	482.858	772.68	1236.46
48	1.01938	0.00101938	0.00902512	9.02512	2.62981	2.57982	2579.82	112.178	110.046	110046	0.794464	0.000794464	0.0646977	64697.7	4	5.03484	5034.84	82.1915	103.455	130.22
50	0.773702	0.000773702	0.00168023	1.68023		0	0	NA	NA	NA	0.251211	0.000251211	ND	ND		0	0		0	0
51	NA	NA	NA	NA	NA	NA	NA	NA	NA	NA	NA	NA	NA	NA		ND	ND
MEAN	1.50062	0.00150062	0.0992537	122.261	3.58365	2.80857	2808.57	111.577	99.5273	99527.3	1.13965	0.00113965	0.225132	225132	3.83942	4.03736	4037.36	144.92	190.341	67925.5

## Sheet: Tables for Analysis
			Low Season (V2)								High Season (V1)
Date	ID No.	No of Sample	MDA (µM/mg creatinine)	1-OHP (mg/g creatinine)	8-epi-PGF2α (pg/mg creatinine)	PM Values	Average			Date	ID No.	No of Sample	MDA (µM/mg creatinine)	1-OHP (mg/g creatinine)	8-epi-PGF2α (pg/mg creatinine)	PM Values	Average
2023-12-07	2	1	2.7392	0.0639099	285.296	3.917	1 July- 12 July			21/3/2023	2	1	2.83187	0.0617801	223.747	39.75	10 March- 21 March
2023-12-07	4	2	2.43296	0.0382759	87.9666	3.917				21/3/2023	4	2	2.1763	0.0431616	ND	39.75
2023-12-07	5	3	2.0091	0.0395515	51.0824	3.917				21/3/2023	5	3	3.62186	0.051092	102.678	39.75
2023-12-07	6	4	1.99482	0.112515	10.8546	3.917				21/3/2023	6	4	2.40323	0.419958	ND	39.75
2023-12-07	11	5	2.09442	0.0443542	142.511	3.917				21/3/2023	11	5	1.96148	0.0538148	ND	39.75
13/7/2023	12	6	1.70717	0.0261108	50.7075	4.167	1 July- 13 July			22/3/2023	12	6	2.7971	0.0443327	ND	40.23	10 March- 22 March
13/7/2023	13	7	2.49282	0.15855	5.74332	4.167				22/3/2023	13	7	3.14845	0.129552	ND	40.23
13/7/2023	14	8	1.18753	0.0520852	0.234464	4.167				22/3/2023	14	8	2.95922	0.0744348	ND	40.23
13/7/2023	16	9	2.92696	0.135046	38.3839	4.167				22/3/2023	16	9	3.23328	0.173873	115.334	40.23
13/7/2023	19	10	4.40757	0.105899	145.105	4.167				22/3/2023	19	10	7.17147	0.0909159	130.521	40.23
14/7/2023	21	11	2.3592	1.06721	79.6306	4.083	1 July- 14 July			23/3/2023	21	11	2.46692	2.72842	28.5502	41.64	10 March- 23 March
14/7/2023	24	12	3.05397	0.359297	13.1079	4.083				23/3/2023	24	12	2.20849	0.210982	22.5674	41.64
14/7/2023	25	13	1.72999	0.0501061	122.761	4.083				23/3/2023	25	13	4.1093	0.0642968	152.909	41.64
14/7/2023	33	14	3.77585	0.0213547	202.33	4.083				23/3/2023	33	14	3.43666	0.145377	120.328	41.64
14/7/2023	34	15	1.56789	0.00322022	4.50701	4.083				23/3/2023	34	15	9.08905	ND	120.908	41.64
15/7/2023	35	16	NA	NA	NA	4.417	1 July- 15 July			24/3/2023	35	16	ND	NA	ND	44.6	10 March- 24 March
15/7/2023	36	17	1.7019	0.0207948	53.8293	4.417				24/3/2023	36	17	3.07945	0.0652581	86.2745	44.6
15/7/2023	40	18	2.44772	0.0263234	120.635	4.417				24/3/2023	40	18	2.837	0.043399	27.705	44.6
15/7/2023	41	19	1.95853	0.0216971	22.0347	4.417				24/3/2023	41	19	3.51275	0.10221	312.359	44.6
15/7/2023	42	20	3.29821	0.00942569	26.7429	4.417				24/3/2023	42	20	17.864	0.229718	615.13	44.6
16/7/2023	43	21	1.41624	0.0242709	34.8238	4.25	1 July- 16 July			25/3/2023	43	21	2.89824	0.0858188	ND	48.25	10 March- 25 March
16/7/2023	44	22	10.5438	0.00819857	420.901	4.25				25/3/2023	44	22	3.07635	0.05434	337.835	48.25
16/7/2023	46	23	3.22952	0.0632862	54.2169	4.25				25/3/2023	46	23	3.46215	0.105231	153.165	48.25
16/7/2023	47	24	6.55905	0.0191506	305.204	4.25				25/3/2023	47	24	5.55461	0.135379	772.68	48.25
16/7/2023	48	25	2.57982	0.00902512	110.046	4.25				25/3/2023	48	25	5.03484	0.0646977	103.455	48.25

## Sheet: PM2.5 data
	PM2.5 Data 2023
Date	Mar	Apr	May	July
1	82	160	18	1
2	81	127	13	2
3	68	135	14	1
4	59	156	17	7
5	54	168	28	5
6	53	168	31	3
7	50	180	31	3
8	55	146	30	9
9	68	133	5	7
10	73	100	10	4
11	79	102	11	2	Average of July
12	38	116	5	3	3.91667
13	32	98	2	4	3.92308
14	32	85	11	1	3.71429
15	30	115	16	5	3.8
16	27	89	13	5	3.875
17	30	65	17	5
18	29	66	20	5
19	28	68	19	3
20	36	54	17	3	Average of March
21	43	50	19	4	39.75
22	46	56	18	5	40.2308
23	60	25	18	6	41.6429
24	86	19	14	4	44.6
25	103	22	15	3	48.25
26	80	29	15	7
27	92	25	14	7
28	155	28	15	4
29	186	31	12	3
30	164	32	6	2
	67.3	88.2667	15.8	4.1
	Mean		SD
	High=V1	77.7833	47.3272
	Low=V2	9.95	7.89856
	High PM2.5=Mar+Apr		Low PM2.5=May+Jul

## Sheet: Biomarkers data_Imputation
Biomarkers Data_Imputation
ID	V1_Creat_mg_ml	V2_Creat_mg_ml	V1_Creat_g_ml	V2_Creat_g_ml	V1_OHP_mg_g	V2_OHP_mg_g	V1_OHP_ng_g	V2_OHP_ng_g	V1_MDA_micrM	V2_MDA_micrM	V1_MDA_micrM_mg	V2_MDA_micrM_mg	V1_MDA_micrM_g	V2_MDA_micrM_g	V1_PGF2_pg	V2_PGF2_pg	V1_PGF2_pg_mg	V2_PGF2_pg_mg	V1_PGF2_pg_g	V2_PGF2_pg_g	v1_PGFmg	v1_MDAmg	v1_OHPmg	v2_PGFmg	v2_MDAmg	v2_OHPmg	v1_PGFg	v1_MDAg	v1_OHPng	v2_PGFg	v2_MDAg	v2_OHPng	mn_v1_PGFmg	mn_v2_PGFmg	mn_v1_PGFg	mn_v2_PGFg	mn_v1_MDAmg	mn_v2_MDAmg	mn_v1_MDAg	mn_v2_MDAg	mn_v1_OHPmg	mn_v2_OHPmg	mn_v1_OHPng	mn_v2_OHPng
2	1.25	1.6	0	0	0.06	0.06	61780.1	63909.9	3.54	4.39	2.83	2.74	2831.87	2192.31	279.96	456.67	174.9	285.3	139978	228336	174.9	2.83	0.06	285.3	2.74	0.06	139978	2831.87	61780.1	228336	2192.31	63909.9	174.9	285.3	139978	228336	2.83	2.74	2831.87	2192.31	0.06	0.06	61780.1	63909.9
4	1.81	1.48	0	0	0.04	0.04	43161.6	38.28	3.93	3.59	2.18	2.43	2176.3	2432.96	0	129.85	0	87.97	0	87966.6		2.18	0.04	87.97	2.43	0.04		2176.3	43161.6	87966.6	2432.96	38.28	187.536	87.97	185481	87966.6	2.18	2.43	2176.3	2432.96	0.04	0.04	43161.6	38.28
5	1.15	1.79	0	0	0.05	0.04	51092	39.55	4.17	3.59	3.62	2.01	3621.86	2009.1	118.17	91.31	66.11	51.08	66106.8	51082.4	66.11	3.62	0.05	51.08	2.01	0.04	66106.8	3621.86	51092	51082.4	2009.1	39.55	66.11	51.08	66106.8	51082.4	3.62	2.01	3621.86	2009.1	0.05	0.04	51092	39.55
6	1.79	2.28	0	0	0.42	0.11	419958	112.52	4.31	4.55	2.4	2	2403.23	1994.82	0	24.77	0	10.86	0	10854.6		2.4	0.42	10.86	2	0.11		2403.23	419958	10854.6	1994.82	112.52	187.536	10.86	185481	10854.6	2.4	2	2403.23	1994.82	0.42	0.11	419958	112.52
11	2.11	2.15	0	0	0.05	0.04	53814.8	44.35	4.14	4.51	1.96	2.09	1961.49	2094.42	0	306.52	0	142.51	0	142511		1.96	0.05	142.51	2.09	0.04		1961.49	53814.8	142511	2094.42	44.35	187.536	142.51	185481	142511	1.96	2.09	1961.49	2094.42	0.05	0.04	53814.8	44.35
12	1.79	2.64	0	0	0.04	0.03	44332.7	26.11	5.01	4.51	2.8	1.71	2797.1	1707.17	0	133.81	0	50.71	0	50707.5		2.8	0.04	50.71	1.71	0.03		2797.1	44332.7	50707.5	1707.17	26.11	187.536	50.71	185481	50707.5	2.8	1.71	2797.1	1707.17	0.04	0.03	44332.7	26.11
13	1.55	1.7	0	0	0.13	0.16	129552	158.55	4.87	4.24	3.15	2.49	3148.45	2492.82	0	9.77	0	5.74	0	5743.32		3.15	0.13	5.74	2.49	0.16		3148.45	129552	5743.32	2492.82	158.55	187.536	5.74	185481	5743.32	3.15	2.49	3148.45	2492.82	0.13	0.16	129552	158.55
14	1.33	2.94	0	0	0.07	0.05	74434.8	52.09	3.93	3.5	2.96	1.19	2959.23	1187.53	0	0.69	0	0.23	0	234.46		2.96	0.07	0.23	1.19	0.05		2959.23	74434.8	234.46	1187.53	52.09	187.536	0.23	185481	234.46	2.96	1.19	2959.23	1187.53	0.07	0.05	74434.8	52.09
16	1.14	1.23	0	0	0.17	0.14	173873	135.05	3.69	3.59	3.23	2.93	3233.28	2926.96	131.54	47.1	107.2	38.38	107203	38383.9	107.2	3.23	0.17	38.38	2.93	0.14	107203	3233.28	173873	38383.9	2926.96	135.05	107.2	38.38	107203	38383.9	3.23	2.93	3233.28	2926.96	0.17	0.14	173873	135.05
19	0.62	0.79	0	0	0.09	0.11	90915.9	105.9	4.46	3.47	7.17	4.41	7171.47	4407.57	81.11	114.28	103	145.1	102995	145105	103	7.17	0.09	145.1	4.41	0.11	102995	7171.47	90915.9	145105	4407.57	105.9	103	145.1	102995	145105	7.17	4.41	7171.47	4407.57	0.09	0.11	90915.9	105.9
21	1.62	1.4	0	0	2.73	1.07	2.72842e+06	1067.21	4	3.3	2.47	2.36	2466.92	2359.2	46.29	111.48	33.07	79.63	33066.3	79630.6	33.07	2.47	2.73	79.63	2.36	1.07	33066.3	2466.92	2.72842e+06	79630.6	2359.2	1067.21	33.07	79.63	33066.3	79630.6	2.47	2.36	2466.92	2359.2	2.73	1.07	2.72842e+06	1067.21
24	1.9	1.25	0	0	0.21	0.36	210982	359.3	4.19	3.83	2.21	3.05	2208.49	3053.97	42.84	16.45	34.14	13.11	34143.6	13107.9	34.14	2.21	0.21	13.11	3.05	0.36	34143.6	2208.49	210982	13107.8	3053.97	359.3	34.14	13.11	34143.6	13107.8	2.21	3.05	2208.49	3053.97	0.21	0.36	210982	359.3
25	1.04	1.77	0	0	0.06	0.05	64296.8	50.11	4.29	3.06	4.11	1.73	4109.3	1729.99	159.58	217.32	90.14	122.76	90143.5	122761	90.14	4.11	0.06	122.76	1.73	0.05	90143.5	4109.3	64296.8	122761	1729.99	50.11	90.14	122.76	90143.5	122761	4.11	1.73	4109.3	1729.99	0.06	0.05	64296.8	50.11
33	0.91	0.84	0	0	0.14	0.02	145377	21.36	3.14	3.18	3.44	3.78	3436.66	3775.85	109.75	170.55	130.21	202.33	130208	202330	130.21	3.44	0.14	202.33	3.78	0.02	130208	3436.66	145377	202330	3775.85	21.36	130.21	202.33	130208	202330	3.44	3.78	3436.66	3775.85	0.14	0.02	145377	21.36
34	0.42	1.71	0	0	0	0	0	3.22	3.86	2.68	9.09	1.57	9089.05	1567.89	51.29	7.7	30.03	4.51	30030.9	4507.01	30.03	9.09		4.51	1.57		30030.9	9089.05		4507.01	1567.89	3.22	30.03	4.51	30030.9	4507.01	9.09	1.57	9089.05	1567.89	0.224348	0.107826	225132	3.22
36	0	0	0	0	0	0	0	0	4.29	3.71	0	0	0	0	25.27	33.01	0	0	0	0													187.536	99.5275	185481	97153.9	4.20625	2.92625	4205.59	2902.81	0.224348	0.107826	225132	225132
40	1.24	2.07	0	0	0.07	0.02	65258.1	20.8	3.83	3.52	3.08	1.7	3079.45	1701.9	107.35	111.31	51.92	53.83	51914.8	53829.3	51.92	3.08	0.07	53.83	1.7	0.02	51914.8	3079.45	65258.1	53829.3	1701.9	20.8	51.92	53.83	51914.8	53829.3	3.08	1.7	3079.45	1701.9	0.07	0.02	65258.1	20.8
41	1.22	1.62	0	0	0.04	0.03	43399	26.32	3.47	3.95	2.84	2.45	2837	2447.72	33.9	194.77	21	120.64	20995.5	120635	21	2.84	0.04	120.64	2.45	0.03	20995.4	2837	43399	120635	2447.72	26.32	21	120.64	20995.4	120635	2.84	2.45	2837	2447.72	0.04	0.03	43399	26.32
42	0.98	1.36	0	0	0.1	0.02	102210	21.7	3.45	2.65	3.51	1.96	3512.75	1958.53	306.52	29.86	226.21	22.04	226213	22034.7	226.21	3.51	0.1	22.04	1.96	0.02	226213	3512.75	102210	22034.7	1958.53	21.7	226.21	22.04	226213	22034.7	3.51	1.96	3512.75	1958.53	0.1	0.02	102210	21.7
43	0.19	1.22	0	0	0.23	0.01	229718	9.43	3.38	4.02	17.86	3.3	17864	3298.21	116.22	32.63	95.25	26.74	95252.7	26742.9	95.25	17.86	0.23	26.74	3.3	0.01	95252.7	17864	229718	26742.9	3298.21	9.43	95.25	26.74	95252.7	26742.9	17.86	3.3	17864	3298.21	0.23	0.01	229718	9.43
44	1	2.04	0	0	0.09	0.02	85818.8	24.27	2.89	2.89	2.9	1.42	2898.24	1416.24	0	71.17	0	34.82	0	34823.8		2.9	0.09	34.82	1.42	0.02		2898.24	85818.8	34823.8	1416.24	24.27	187.536	34.82	185481	34823.8	2.9	1.42	2898.24	1416.24	0.09	0.02	85818.8	24.27
46	0.9	0.29	0	0	0.05	0.01	54340	8.2	2.77	3.09	3.08	10.54	3076.35	10543.8	304.64	123.21	1040.66	420.9	1.04066e+06	420901	1040.66	3.08	0.05	420.9	10.54	0.01	1.04066e+06	3076.35	54340	420901	10543.8	8.2	1040.66	420.9	1.04066e+06	420901	3.08	10.54	3076.35	10543.8	0.05	0.01	54340	8.2
47	0.84	0.93	0	0	0.11	0.06	105231	63.29	2.92	2.99	3.46	3.23	3462.15	3229.52	129.1	50.2	139.43	54.22	139428	54216.9	139.43	3.46	0.11	54.22	3.23	0.06	139428	3462.15	105231	54216.9	3229.52	63.29	139.43	54.22	139428	54216.9	3.46	3.23	3462.15	3229.52	0.11	0.06	105231	63.29
48	0.63	0.63	0	0	0.14	0.02	135379	19.15	3.47	4.14	5.56	6.56	5554.62	6559.05	482.86	192.84	764.22	305.2	764217	305204	764.22	5.56	0.14	305.2	6.56	0.02	764217	5554.62	135379	305204	6559.05	19.15	764.22	305.2	764217	305204	5.56	6.56	5554.62	6559.05	0.14	0.02	135379	19.15
50	0.79	1.02	0	0	0.07	0.01	64697.7	9.03	4	2.63	5.04	2.58	5034.84	2579.82	82.19	112.18	80.63	110.05	80629.1	110046	80.63	5.04	0.07	110.05	2.58	0.01	80629.1	5034.84	64697.7	110046	2579.82	9.03	80.63	110.05	80629.1	110046	5.04	2.58	5034.84	2579.82	0.07	0.01	64697.7	9.03
